# Supplementary material
Source: MDPI journal article supplement (https://www.mdpi.com/2673-4133/5/2/13)
Supplement: s1 [file s1]

Archive with 14 entries (14 files):
- Appendix S1.pdf
- Figure S1.pdf
- Figure S2.pdf
- Table S1.pdf
- Table S10.pdf
- Table S11.pdf
- Table S2.pdf
- Table S3.pdf
- Table S4.pdf
- Table S5.pdf
- Table S6.pdf
- Table S7.pdf
- Table S8.pdf
- Table S9.pdf
